# Supplementary material for: Monitoring the mechanism of formation of [Ce(1,10-phenanthroline)2(NO3)3] by in situ luminescence analysis of 5d–4f electronic transitions
Source: Royal Society of Chemistry journal article supplement (doi:10.1039/c7ra07488c), 2017-01-01
Supplement: c7ra07488c1.pdf [file c7ra07488c1.pdf]

# Monitoring the mechanism of formation of [Ce(1,10-phenanthroline)<sub>2</sub>(NO<sub>3</sub>)<sub>3</sub>] by *in-situ* luminescence analysis of 5d-4f electronic transitions

Laura Ruiz Arana,<sup>a</sup> Patric Lindenberg,<sup>a</sup> Hajer Said,<sup>a</sup> Marvin Radke,<sup>a</sup> Niclas Heidenreich,<sup>a, b</sup>  
César dos Santos Cunha,<sup>a, c</sup> Sebastian Leubner<sup>a</sup> and Huayna Terraschke<sup>a, \*</sup>

<sup>a</sup> Institute of Inorganic Chemistry, Christian-Albrechts-Universität zu Kiel, Max-Eyth-Straße 2,  
24118 Kiel, Germany. E-mail: hterraschke@ac.uni-kiel.de.

<sup>b</sup> DESY Photon Science, Notkestr. 85, 22607 Hamburg, Germany.

<sup>c</sup> Institute of Chemistry, University of São Paulo, Av. Prof. Lineu Prestes 748, 05508-000 São  
Paulo-SP, Brazil.

## Electronic supplementary information

### Contents

|                                                                                                                                |   |
|--------------------------------------------------------------------------------------------------------------------------------|---|
| 1. Experimental Setups                                                                                                         | 2 |
| 2. <i>Ex-situ</i> and <i>in-situ</i> luminescence spectra                                                                      | 4 |
| 3. <i>Ex-situ</i> X-ray diffraction analysis                                                                                   | 5 |
| 4. <i>In-situ</i> IR measurements                                                                                              | 5 |
| 5. <i>In-situ</i> X-ray diffraction analysis at the DESY beamline P07B                                                         | 6 |
| 6. <i>In-situ</i> measurements of light transmission and <i>in-situ</i> X-ray diffraction analysis at the<br>DESY beamline P09 | 7 |
| References                                                                                                                     | 9 |

## 1. Experimental Setups

Table 1: Different experimental conditions applied for *in-situ* monitoring the formation of  $[\text{Ce}(\text{phen})_2(\text{NO}_3)_3]$  (phen = 1,10-phenanthroline) at the University of Kiel (Setup I, experiment type 1-3) and at the Deutsches Elektronen-Synchrotron (DESY) (Setup II, experiment types 4-5).

| Number of experiment type                                                     | 1    | 2    | 3    | 4    | 5    |
|-------------------------------------------------------------------------------|------|------|------|------|------|
| Added $\text{Ce}(\text{NO}_3)_3 \cdot 6 \text{H}_2\text{O}$ / mmol            | 0.69 | 0.69 | 0.69 | 0.69 | 0.69 |
| Volume of $\text{Ce}(\text{NO}_3)_3 \cdot 6 \text{H}_2\text{O}$ solution / mL | 30   | 30   | 30   | 30   | 30   |
| Added 1,10-phenanthroline / mmol                                              | 1.38 | 1.38 | 1.38 | 1.38 | 1.38 |
| Volume of 1,10- phenanthroline solution / mL                                  | 5    | 5    | 5    | 5    | 5    |
| Temperature / °C                                                              | 35   | 20   | 25   | 25   | 30   |
| Excitation wavelength / nm                                                    | -    | 400  | 400  | -    | 365  |
| Emission wavelength / nm                                                      | -    | 700  | 700  | -    | -    |
| Beamline                                                                      | -    | -    | -    | P07  | P09  |
| Energy of synchrotron X-ray beam / keV                                        | -    | -    | -    | 87.1 | 23   |

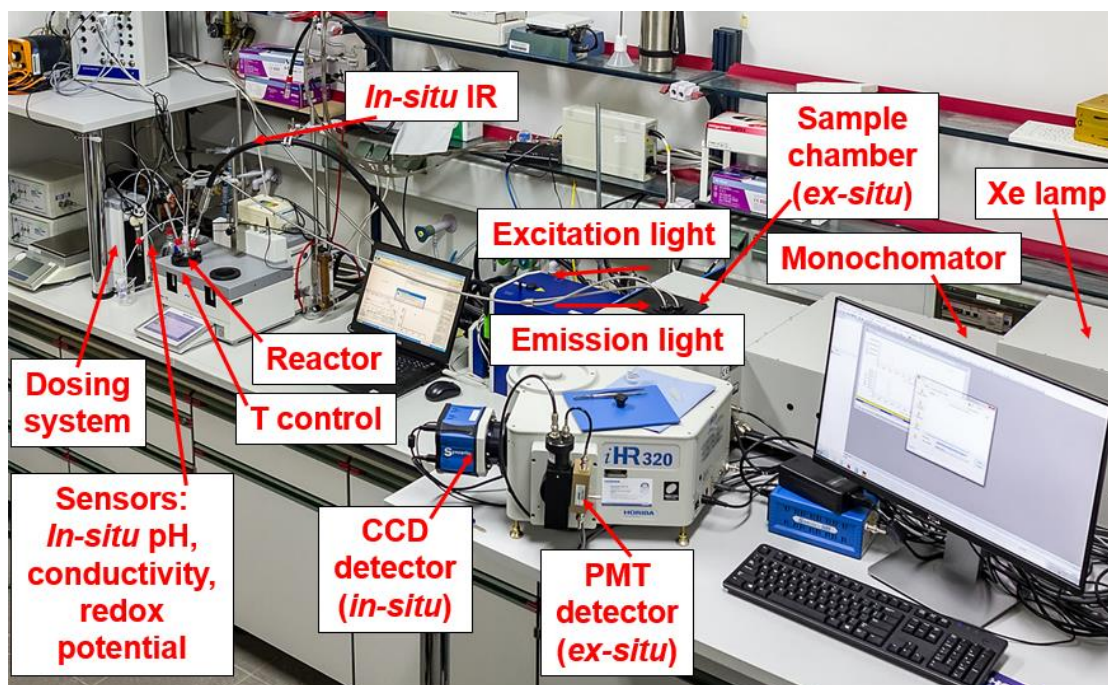

Figure S1: Setup I of the *in-situ* crystallization cell at University of Kiel showing the combination of a Mettler Toledo Easy Max™ reactor system with a Horiba Fluorolig-3 fluorescence spectrometer. The Easy Max™ reactor system includes a dosing system, temperature control, *in-situ* measurements of pH value, ion conductivity, redox potential and infrared (IR)

spectroscopy. The Fluorolog-3 fluorescence spectrometer is equipped with a Y-shaped optical fiber, a Xenon lamp, a charged-coupled-device (CCD)-based and a photomultiplier tube (PMT) detector.

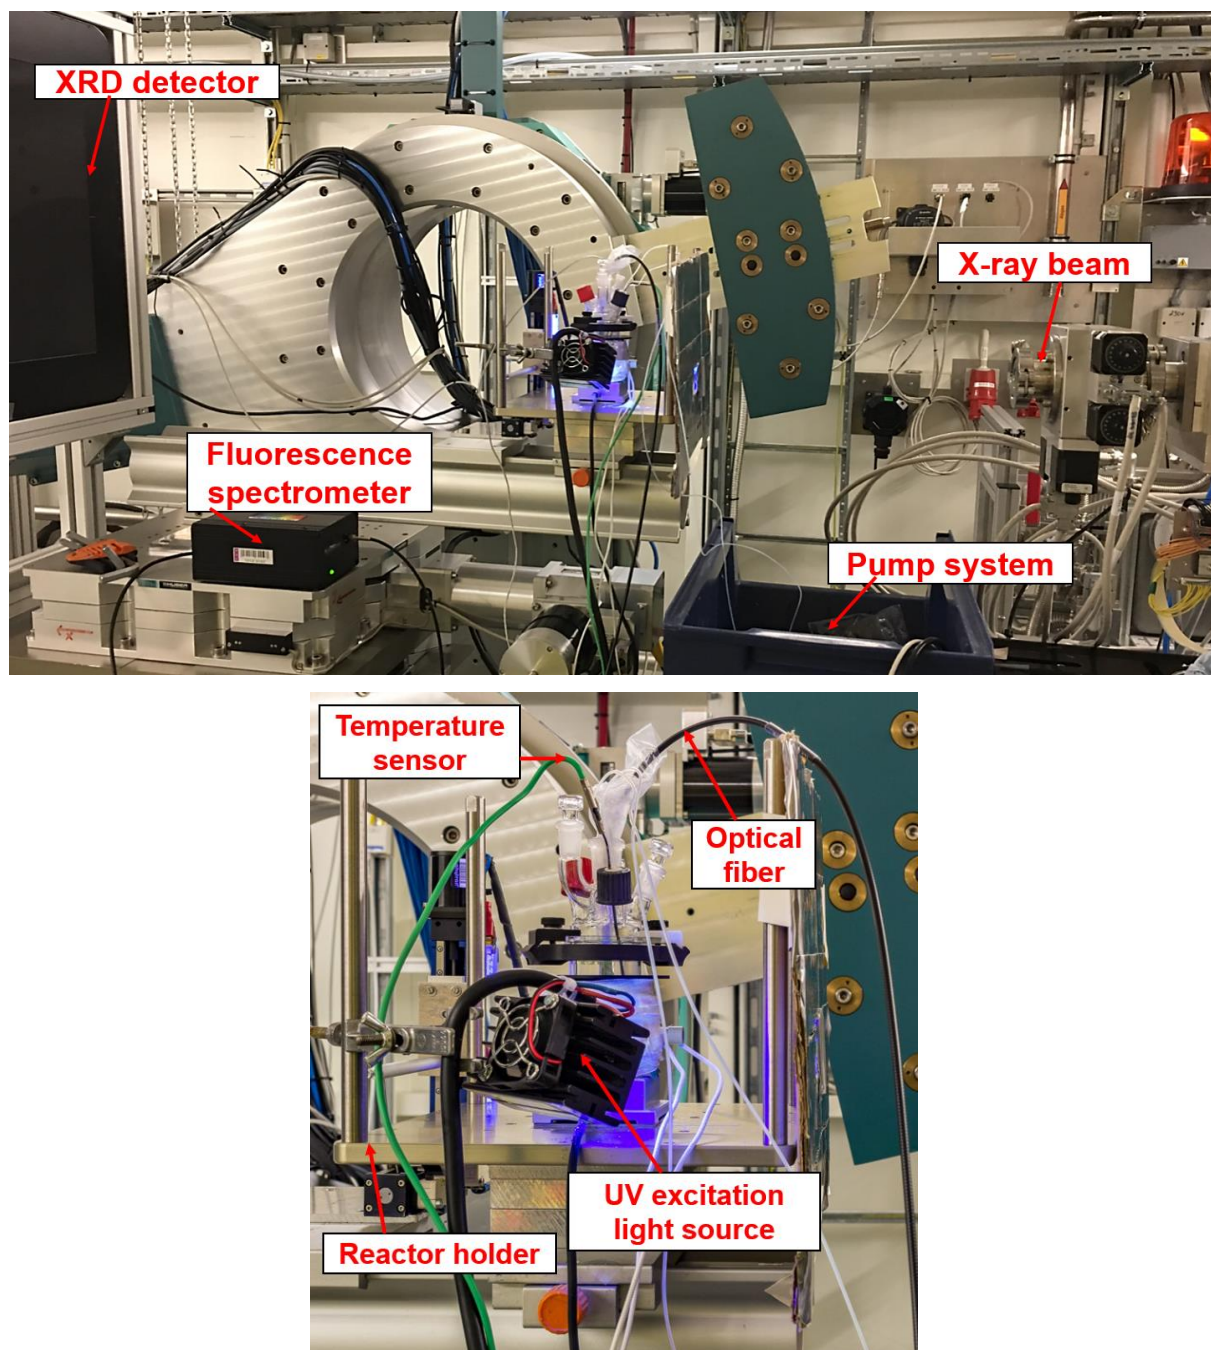

Figure S2: Setup II used at the DESY for simultaneous measurements of *in-situ* X-ray diffraction (XRD) analysis and light transmission.

## 2. *Ex-situ* and *in-situ* luminescence spectra

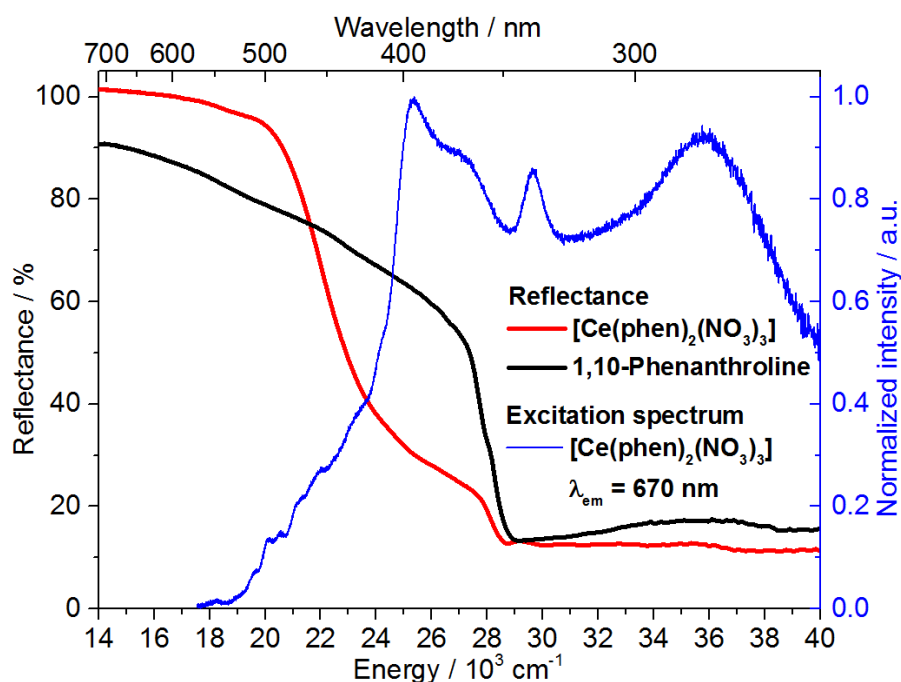

Figure S3: *Ex-situ* excitation spectrum of the  $[\text{Ce}(\text{phen})_2(\text{NO}_3)_3]$  complex ( $\lambda_{\text{em}} = 670$  nm, blue curve, experiment 1, Table S1) in comparison to reflectance spectra of  $[\text{Ce}(\text{phen})_2(\text{NO}_3)_3]$  (red curve, experiment 2, Table S1) and pure 1,10-phenanthroline (black curve).

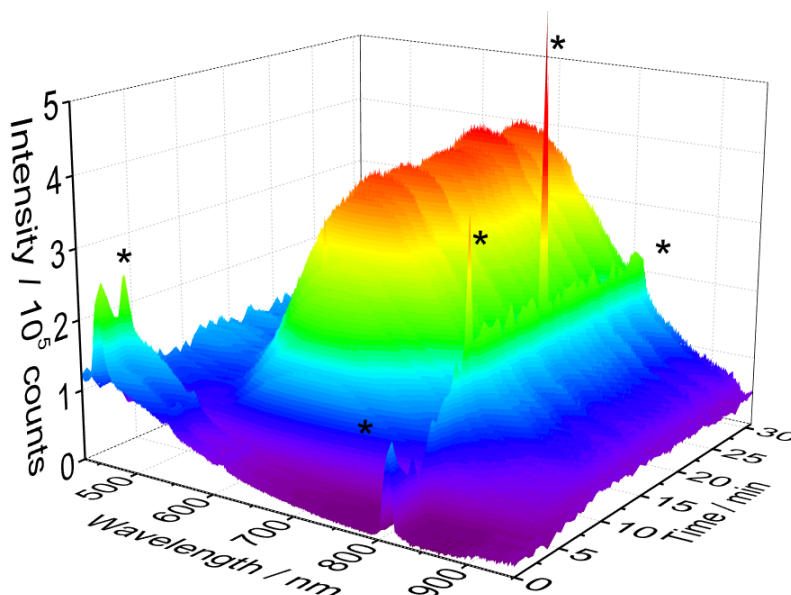

Figure S4: *In-situ* luminescence spectra ( $\lambda_{\text{ex}} = 400$  nm) showing the shift of the emission band assigned to  $\text{Ce}^{3+}$  in the ethanolic solution at 415-700 nm to 500-900 nm, assigned to  $\text{Ce}^{3+}$  within the  $[\text{Ce}(\text{phen})_2(\text{NO}_3)_3]$  for monitoring the formation of the solid complex (experiment 1, Table S1). The asterisk (\*) marks measurement artefacts.



### 3. *Ex-situ* X-ray diffraction analysis

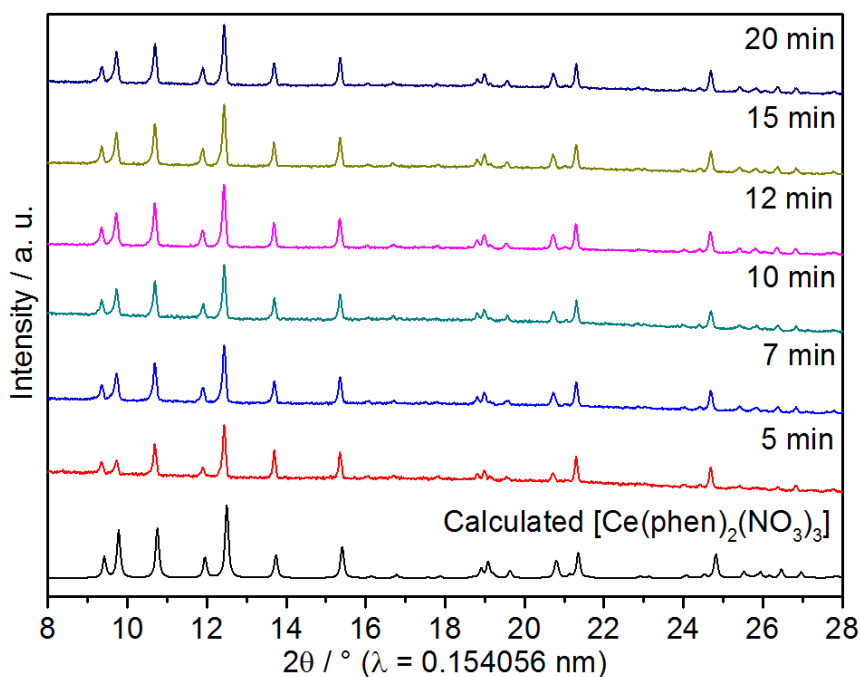

Figure S5: *Ex-situ* XRD analysis of samples removed from the reactor at t = 5, 7, 10, 12, 15 and 15 min during the synthesis of [Ce(phen)<sub>2</sub>(NO<sub>3</sub>)<sub>3</sub>], in comparison to the respective calculated powder pattern<sup>[1]</sup> (experiment 2, Table S1).

### 4. *In-situ* IR measurements

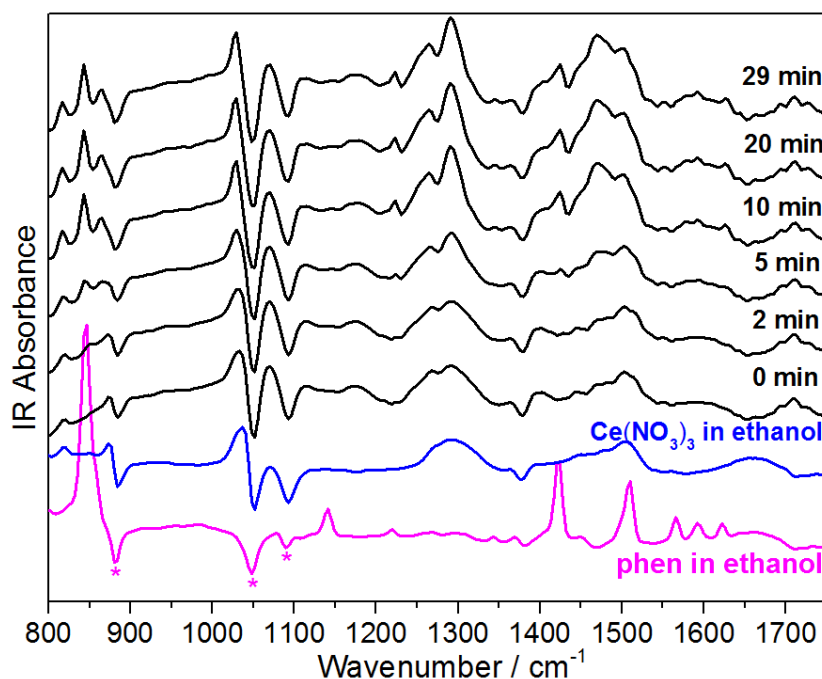

Figure S6: Infrared spectra of the initial phen and Ce(NO<sub>3</sub>)<sub>3</sub>·6H<sub>2</sub>O ethanolic solutions compared to the *in-situ* IR data recorded during synthesis of [Ce(phen)<sub>2</sub>(NO<sub>3</sub>)<sub>3</sub>] (experiment 3, Table S1). The asterisk (\*) signs show negative values for the IR bands, caused by air bubbles on the sensor.

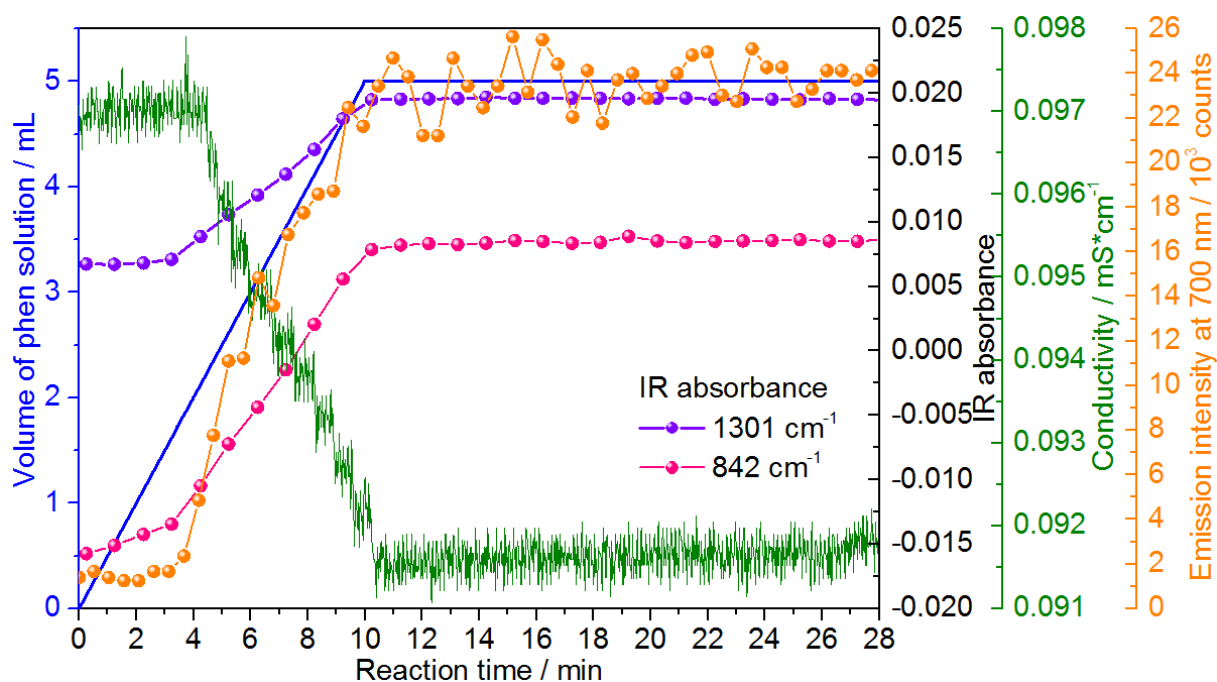

Figure S7: Time dependence of the addition of the phen solution to the  $\text{Ce}(\text{NO}_3)_3 \cdot 6\text{H}_2\text{O}$  solution (blue curve), of the IR bands at  $1301\text{ cm}^{-1}$  ( $\text{NO}_3^-$ , violet curve) and  $842\text{ cm}^{-1}$  (phen, pink curve), of the ion conductivity (green curve) as well as of the simultaneously measured emission intensity of  $[\text{Ce}(\text{phen})_2(\text{NO}_3)_3]$  at  $700\text{ nm}$  (orange curve) (experiment 3, Table S1).

## 5. *In-situ* X-ray diffraction analysis at the DESY beamline P07B

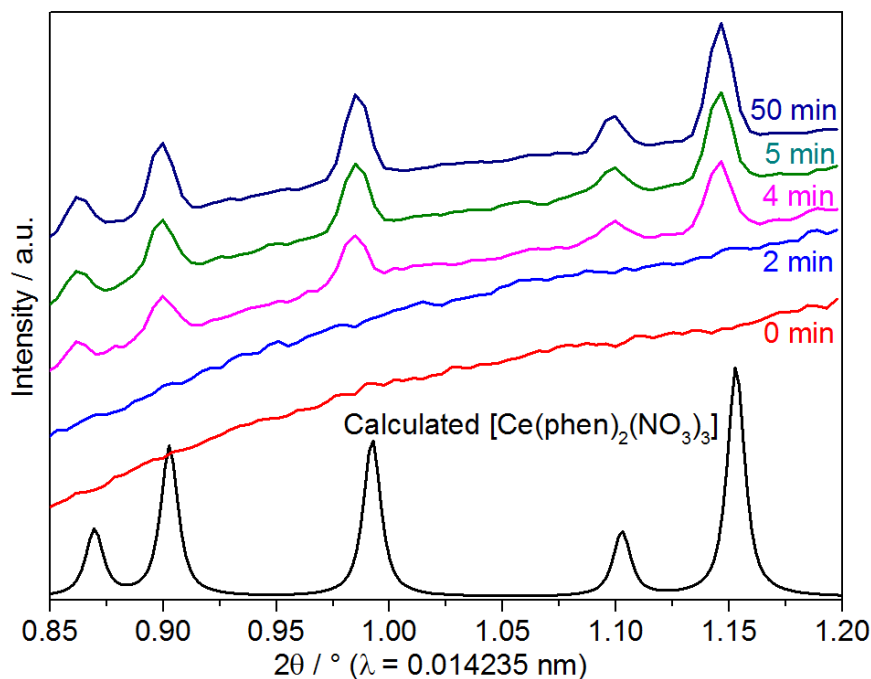

Figure S8: Time-resolved *in-situ* XRD patterns measured at the DESY beamline P07B during the formation of  $[\text{Ce}(\text{phen})_2(\text{NO}_3)_3]$  (experiment 4, Table S1) in comparison to the respective calculated pattern<sup>[1]</sup>.

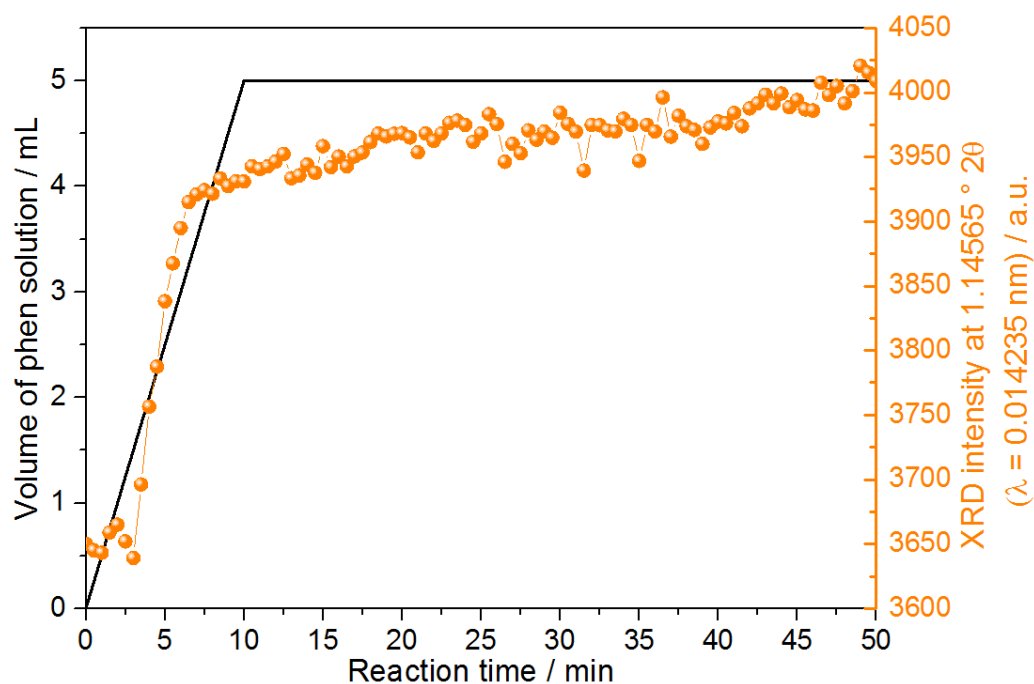

Figure S9: XRD intensity at  $1.14565^\circ 2\theta$ , assigned to the (1,1,1) reflection of  $[\text{Ce}(\text{phen})_2(\text{NO}_3)_3]$  (orange curve) and time-dependence of the volume of phen solution added to the  $\text{Ce}(\text{NO}_3)_3 \cdot 6\text{H}_2\text{O}$  solution (black curve) during synthesis of  $[\text{Ce}(\text{phen})_2(\text{NO}_3)_3]$  at the DESY beamline P07B (experiment 4, Table S1).

## 6. *In-situ* measurements of light transmission and *in-situ* X-ray diffraction analysis at the DESY beamline P09

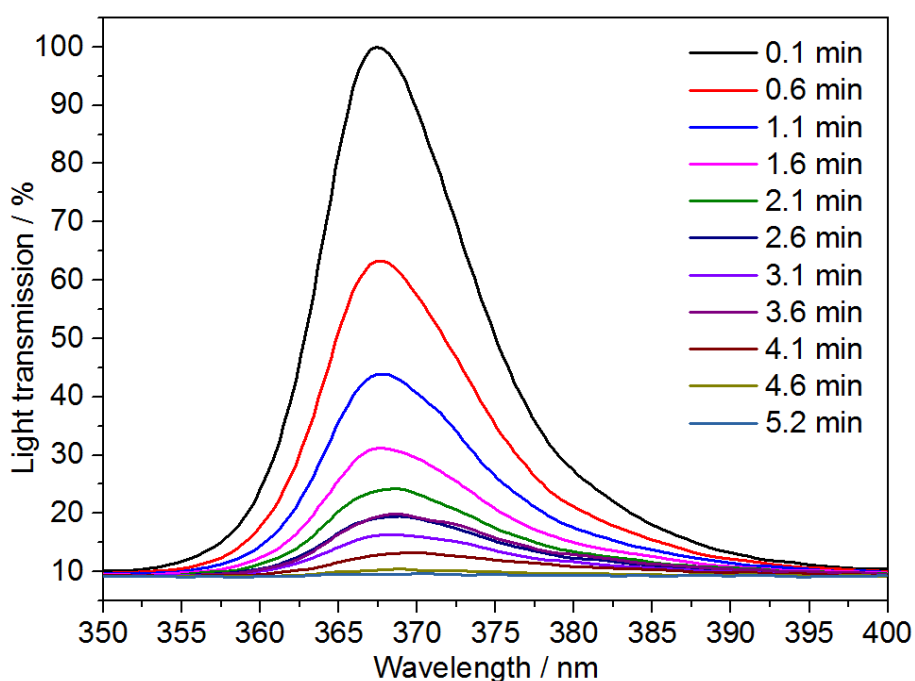

Figure S10: Time-dependent *in-situ* light transmission measured simultaneously to *in-situ* XRD at the DESY beamline P09 during synthesis of  $[\text{Ce}(\text{phen})_2(\text{NO}_3)_3]$  (experiment 5, Table S1).

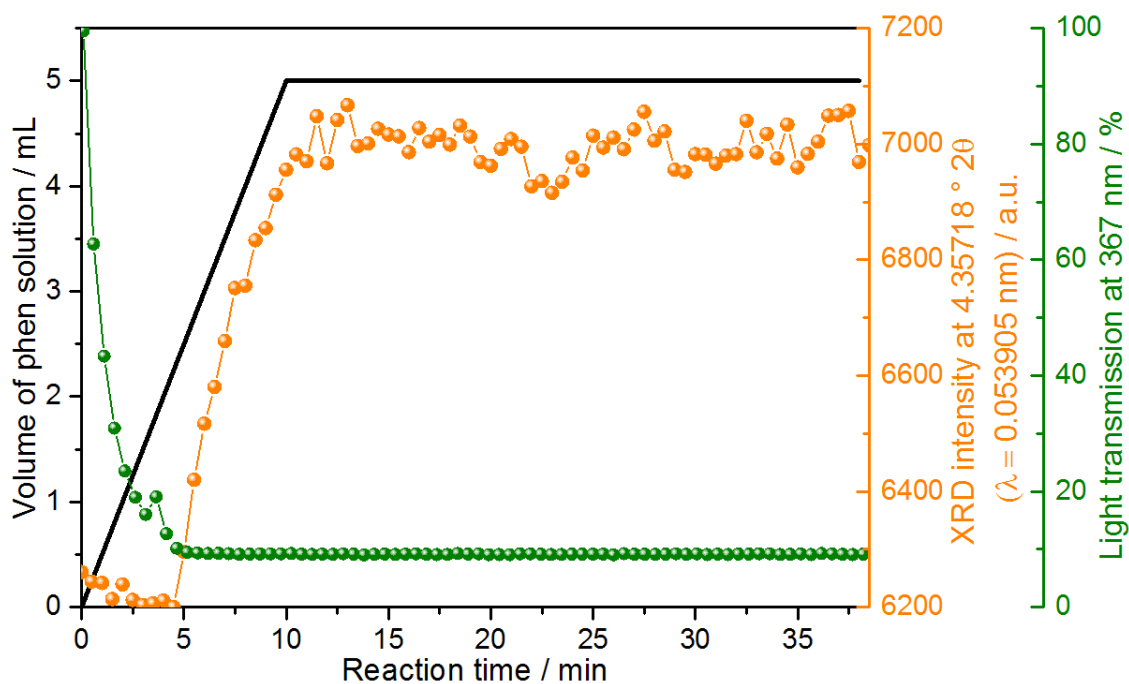

Figure S11: XRD intensity at  $4.35718^\circ 2\theta$ , assigned to the (1,1,1) reflection of  $[\text{Ce}(\text{phen})_2(\text{NO}_3)_3]$  (orange curve) in comparison to the time-dependent volume of phen solution added to the  $\text{Ce}(\text{NO}_3)_3 \cdot 6\text{H}_2\text{O}$  solution (black curve) and light transmission at 367 nm (green curve) during synthesis of  $[\text{Ce}(\text{phen})_2(\text{NO}_3)_3]$  at the DESY beamline P09 (experiment 5, Table S1).

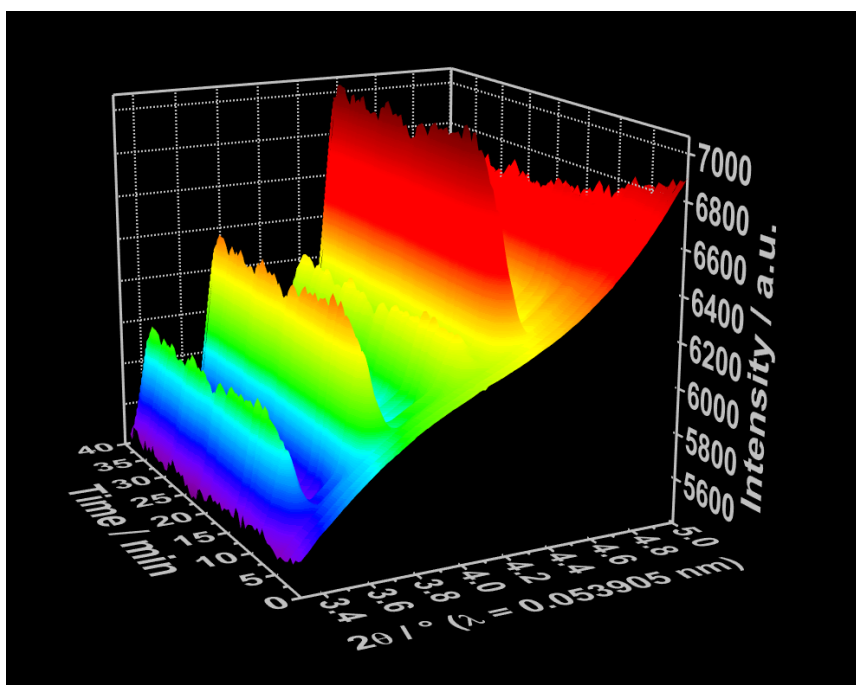

Figure S12: *In-situ* X-ray diffraction patterns measured during synthesis of  $[\text{Ce}(\text{phen})_2(\text{NO}_3)_3]$  at the DESY beamline P09 (experiment 5, Table S1).



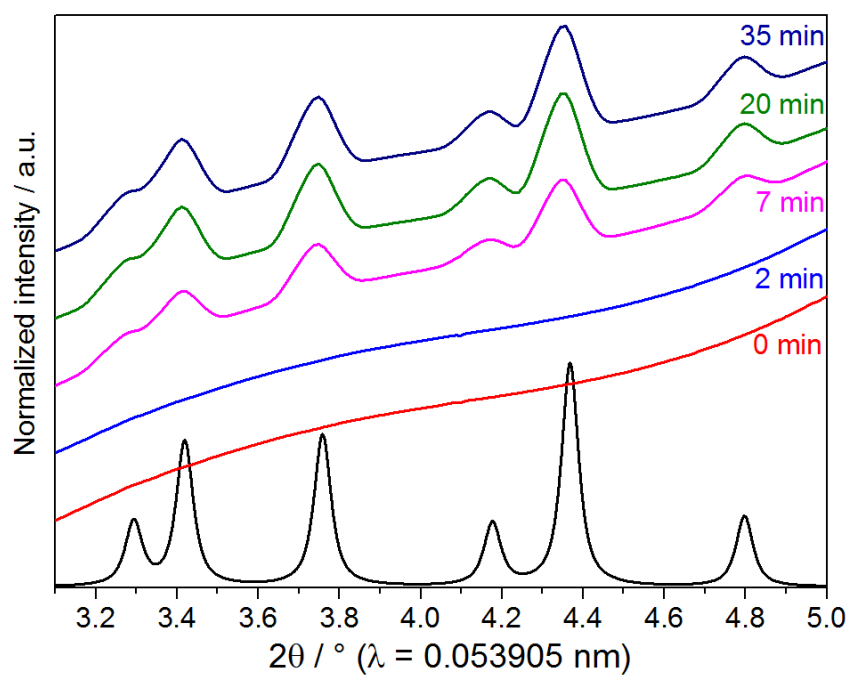

Figure S13: Time-resolved *in-situ* XRD patterns measured at the DESY beamline P09 during the formation of  $[\text{Ce}(\text{phen})_2(\text{NO}_3)_3]$  (experiment 5, Table S1) in comparison to the respective calculated pattern<sup>[1]</sup>.

## References

- [1] Q. Y. Lin, Y. L. Feng, *Z. Kristallogr.*, 2003, **218**, 531
